1 **Hebbian plasticity induced by temporally coincident BCI enhances post-stroke motor recovery**

2 Johanna Krueger<sup>1</sup>, Richard Krauth<sup>1</sup>, Christoph Reichert<sup>2</sup>, Serafeim Perdakis<sup>3</sup>, Susanne Vogt<sup>4</sup>, Tessa  
3 Huchtemann<sup>5</sup>, Stefan Dürschmid<sup>2,6</sup>, Almut Sickert<sup>7</sup>, Juliane Lamprecht<sup>7,8</sup>, Almir Huremovic<sup>7,9</sup>, Michael  
4 Görtler<sup>4</sup>, Slawomir J. Nasuto<sup>10</sup>, I-Chin Tsai<sup>1</sup>, Robert T. Knight<sup>11,12</sup>, Hermann Hinrichs<sup>2</sup>, Hans-Jochen  
5 Heinze<sup>2,13</sup>, Sabine Lindquist<sup>14</sup>, Michael Sailer<sup>7</sup>, Jose del R. Millán<sup>15,16</sup>, Catherine M. Sweeney-Reed<sup>1,6\*</sup>

6

7 <sup>1</sup>Neurocybernetics and Rehabilitation, Dept. of Neurology, Otto von Guericke University, Magdeburg,  
8 Germany

9 <sup>2</sup>Leibniz Institute for Neurobiology, Magdeburg, Germany

10 <sup>3</sup>School of Computer Science and Electronic Engineering, University of Essex, Colchester, UK

11 <sup>4</sup>Dept. of Neurology, Otto von Guericke University Magdeburg, Germany

12 <sup>5</sup>Dept. of Neurology, University Hospital Münster, Münster, Germany

13 <sup>6</sup>Center for Behavioral Brain Sciences (CBBS), Otto von Guericke University Magdeburg, Germany

14 <sup>7</sup>Neurorehabilitation Centre, Median Hospital, Magdeburg, Germany

15 <sup>8</sup>Health and Care Sciences, Martin Luther University Halle-Wittenberg, Halle, Germany

16 <sup>9</sup>Dept. of Neurology, Ingolstadt Hospital, Ingolstadt, Germany

17 <sup>10</sup>Biomedical Engineering, University of Reading, Reading, UK

18 <sup>11</sup>Helen Wills Neuroscience Institute, University of California – Berkeley, Berkeley, USA

19 <sup>12</sup>Dept. of Psychology, University of California, Berkeley, Berkeley, USA

20 <sup>13</sup>University Hospital Magdeburg, Otto von Guericke University Magdeburg, Magdeburg, Germany

21 <sup>14</sup>Dept. of Neurology, Pfeiffersche Stiftung, Magdeburg, Germany

22 <sup>15</sup>Dept. of Electrical and Computer Engineering, The University of Texas at Austin, Austin, USA

23 <sup>16</sup>Dept. of Neurology, The University of Texas at Austin, Austin, USAs, USA

24

25 \*Corresponding author:

26 Catherine Sweeney-Reed: catherine.sweeney-reed@med.ovgu.de

27 **Abstract**

28 Functional electrical stimulation (FES) can support functional restoration of a paretic limb post-stroke.  
29 Hebbian plasticity depends on temporally coinciding pre- and post-synaptic activity. A tight temporal  
30 relationship between motor cortical (MC) activity associated with attempted movement and FES-  
31 generated visuo-proprioceptive feedback is hypothesized to enhance motor recovery. Using a brain-  
32 computer interface (BCI) to classify MC spectral power in electroencephalographic (EEG) signals to  
33 trigger FES-delivery with detection of movement attempts improved motor outcomes in chronic stroke  
34 patients. We hypothesized that heightened neural plasticity earlier post-stroke would further enhance  
35 corticomuscular functional connectivity and motor recovery. We compared subcortical non-dominant  
36 hemisphere stroke patients in BCI and Sham (FES temporally independent of MC movement attempt  
37 detection) groups. The primary outcome measure was the Fugl-Meyer Assessment, Upper Extremity  
38 (FMA-UE). We recorded high-density EEG and transcranial magnetic stimulation-induced motor  
39 evoked potentials before and after treatment. The BCI group showed greater: FMA-UE improvement;  
40 motor evoked potential amplitude; beta oscillatory power and long-range temporal correlation  
41 reduction over contralateral MC; and corticomuscular coherence with contralateral MC. These  
42 changes are consistent with enhanced post-stroke motor improvement when movement is  
43 synchronized with MC activity reflecting attempted movement.

44 **Key words:** brain-computer interface; BCI; functional electrical stimulation; FES; acute stroke;  
45 subacute stroke; upper limb rehabilitation; Fugl-Meyer Assessment; FMA; EEG; TMS

## 46 Introduction

47 Stroke is a leading cause of motor disability<sup>1</sup>, with upper limb impairment occurring in over 75% of  
48 patients following acute stroke<sup>2</sup>. Despite the successes of thrombolytic therapy in reducing mortality  
49 and morbidity, a third or less of patients meet the criteria for this treatment, and over half of those  
50 receiving it are left with functional deficits<sup>3</sup>. Motor recovery depends on neural plasticity and the  
51 reorganization of structural and functional motor networks to re-establish corticomuscular  
52 connectivity<sup>4-8</sup>. Neural plasticity is task-specific, time-dependent, and environmentally-influenced<sup>9</sup>.  
53 Various approaches to re-establishment and reinforcement of connectivity between paretic  
54 musculature and residual motor areas are based on targeting Hebbian plasticity by synchronizing  
55 movement-associated visuo-proprioceptive feedback and motor cortical electrophysiological  
56 correlates of movement within a narrow time window<sup>10,11</sup>. Functional electrical stimulation (FES) is an  
57 established therapeutic tool for assisting movement attempts and promoting motor recovery. Studies  
58 involving chronic and subacute stroke patients have enhanced motor recovery when FES delivery is  
59 temporally coupled to movement attempts detected in brain electrical activity, using a brain-  
60 computer interface (BCI)<sup>12-14</sup>. Electroencephalographic (EEG) signals recorded over motor cortex  
61 provided the input to a classifier, and FES was triggered when features derived from these signals were  
62 classified as reflecting attempted movement as opposed to rest. Although starting rehabilitation early  
63 post-stroke is associated with better motor outcomes, putatively due to heightened neural  
64 plasticity<sup>4,15,16</sup>, the majority of studies implementing BCI-FES-based rehabilitation focus on patients in  
65 the chronic phase<sup>17,18</sup>. We hypothesized that earlier initiation of BCI-FES would improve  
66 corticomuscular functional connectivity, resulting in greater motor recovery. We also aimed to  
67 investigate neural correlates of motor recovery in patients receiving BCI-FES to gain a better  
68 understanding of potential mechanisms of action. The early phase post-stroke poses challenges in  
69 therapy program completion, and heterogenous patient groups with cortical and subcortical stroke,  
70 affecting either hemisphere are commonly included. Here we compared outcomes in a BCI and Sham  
71 group in a matched lesion subgroup from the Magdeburg patient cohort (German Clinical Trials  
72 Register: DRKS00007832; DRKS00011522). BCI and Sham patients had suffered a subcortical stroke  
73 affecting the non-dominant hemisphere, and the tight uniformity of the study group enabled group-  
74 level comparisons of electrophysiological and behavioral markers over the treatment period.

75 While clinical outcome is the primary focus in the evaluation of rehabilitation measures, understanding  
76 the mechanisms underlying recovery is the key to informing further development. Electrophysiological  
77 and functional measures of brain activity can provide potential markers of modulation during therapy,  
78 which is an essential component of evaluating the potential of this approach in facilitating motor  
79 recovery. Brain oscillatory activity<sup>19</sup> and corticomuscular functional connectivity<sup>20</sup> have been proposed  
80 as biomarkers of post-stroke recovery. Here we compared clinical outcome and neural correlates of  
81 motor recovery in patients in the acute and subacute phases post-stroke allocated to BCI-FES therapy  
82 (BCI group) or FES delivered without a tight temporal relationship with EEG correlates of movement  
83 attempts (Sham group). The patients-underwent a three-week FES, either BCI-controlled or Sham,  
84 rehabilitation program, with transcranial magnetic stimulation (TMS)-induced motor evoked potential  
85 (MEP) amplitude measurement, and high-density EEG recordings. The EEG analyses included  
86 sensorimotor cortical spectral power, corticomuscular coherence, and long-range temporal correlation  
87 (LRTC).

88 In the BCI group, movement attempts were detected based on the online classification of EEG signals  
89 during the therapy. The sensorimotor rhythm refers to oscillations in brain electrical activity over

90 motor cortical regions in the alpha (8-12 Hz) and beta (13-30 Hz) frequency ranges. Event-related  
91 desynchronization and synchronization (ERD/ERS) index reduction/increase of the sensorimotor  
92 rhythms, detectable as changes in EEG recordings starting before and changing over the course of  
93 movement<sup>21,22</sup>. They provide well-established indices of actual movement, as well as of imagined  
94 movement<sup>23</sup> and movement attempts<sup>24</sup> and are commonly used in BCI applications<sup>25</sup>. EEG recordings  
95 of this rhythm were made from each individual patient during a training session during cued movement  
96 attempts and rest periods. The electrode locations and specific frequencies at which oscillatory power  
97 differences were greatest between movement and rest were selected as features for training the BCI  
98 classifier. EEG data were continuously recorded during the subsequent treatment sessions, with  
99 repeated online classification, and when a movement attempt was identified, FES to the paretic limb  
100 was triggered.

101 The Sham group had the same external set-up at the BCI group, to enable blinding to group allocation.  
102 Each Sham group patient was assigned the classifier output stimulation timing and frequency from a  
103 randomly selected BCI group participant, to ensure that the only difference between the groups was  
104 that the timing of FES in the Sham group was independent of the patient's own cortical activity.

105 Laterality of motor cortical activity plays an important role in post-stroke recovery in two ways. First,  
106 handedness has an impact on movement- and imagined-movement-related sensorimotor cortical  
107 oscillatory activity as well as fMRI activation in healthy participants<sup>26-28</sup>, and activation patterns during  
108 post-stroke rehabilitation differ according to whether the dominant or non-dominant hemisphere is  
109 affected<sup>29,30</sup>. We therefore focused our analyses on the largest possible uniform patient group: right-  
110 handed patients with a non-dominant hemisphere stroke. Second, shifts of abnormal bilateral motor  
111 area activation during paretic hand movement in the subacute phase toward a more unilateral  
112 activation pattern of ipsilesional motor areas in chronic stroke is associated with better motor  
113 outcome<sup>31,32</sup>. On the other hand, while contralesional motor cortical activity is associated with poorer  
114 motor outcomes in the chronic phase post-stroke, this activity appears to play an important role early  
115 post-stroke<sup>31</sup>. We therefore examined electrophysiological changes over the treatment period both in  
116 contralesional and ipsilesional motor cortical regions.

117 The primary outcome measure was change in the Fugl-Meyer Assessment of the Upper Extremity  
118 (FMA-UE) score from before to after treatment. We also examined potential neural correlates of a  
119 direct effect of BCI-FES on relevant neural processes. The amplitude of TMS-induced MEPs provides an  
120 index of the integrity of corticomuscular connectivity, and these were measured before and after the  
121 treatment program. Based on delivery of FES in temporal association with movement-associated  
122 spectral power changes in the sensorimotor rhythm, we compared spectral power across the alpha  
123 and beta frequency ranges after, with that before the treatment program in each group. This included  
124 comparison at a group and an individual patient level and evaluating correlation between oscillatory  
125 power in the sensorimotor rhythm and the FMA-UE score after treatment. As the aim was re-  
126 establishment of corticomuscular functional connectivity, we also assessed change in the EEG-EMG  
127 coherence in the same frequency range from before to after treatment in each group, based on the  
128 suggestion that this measure could provide a biomarker for motor recovery post-stroke<sup>20</sup>. We also  
129 evaluated a potential impact of BCI-FES on LRTC. LRTC provides an index of correlation between  
130 different time periods in a time series, providing an index of the extent to which neuronal systems are  
131 at a near-critical state permitting rapid changes in functional connectivity as processing demands  
132 change over time<sup>33</sup>. LRTC has been postulated to facilitate information transfer in neuronal networks,  
133 with physiological memory of a past activity influencing future activity through continuous

134 modification and recurrent interactions between ongoing activity and stimulus-induced changes in  
135 activity<sup>33,34</sup>. Cumulative modification in network functional connectivity, resulting from activity-  
136 dependent plasticity, has been proposed to provide the physiological mechanism underlying the power  
137 law correlations in ongoing oscillatory neuronal network activity, thus influencing future recruitment  
138 of neurons to engage in particular oscillatory activity<sup>33</sup>. LRTC observed in EEG signals shows power-law  
139 behavior, suggesting that the underlying neurodynamic processes are similar on different time scales<sup>34</sup>.  
140 The amplitude envelope of alpha and beta oscillations displays intermittent fluctuations and power-  
141 law decay of the autocorrelation over hundreds of seconds, suggesting a self-organized dynamical  
142 critical state<sup>33</sup>. Task-relevant neural assemblies, defined by temporal relationships between activity in  
143 different brain areas, form and dissolve over time<sup>35,36</sup>. Sensory stimuli result in reorganization of  
144 ongoing endogenous brain dynamics<sup>37</sup>. As activity is propagated through cortical networks, altering  
145 functional connectivity, reflected in changes in LRTC, and influencing future neuronal recruitment,  
146 somatosensory stimuli disrupt these transient neural assemblies, degrading ongoing LRTC<sup>33</sup>. We  
147 hypothesized that tight temporal coupling between motor cortical oscillatory power and the  
148 somatosensory stimulus in the BCI group would result in a greater reduction in LRTC than a  
149 somatosensory stimulus delivered independently of motor cortical activity corresponding to a  
150 movement attempt.

## 151 **Results**

### 152 Patients

153 Of the patients recruited in Magdeburg (N = 32), 62.5 % (n = 20) completed the rehabilitation program.  
154 The reasons for discontinuing participation were complete recovery (n = 2), finding the therapy too  
155 tiring (n = 1), the sequelae of a previously diagnosed psychiatric (n = 4) or physical illness (n = 4), and  
156 the patient leaving the region (n = 1). Ten patients were allocated to the BCI group and 10 patients to  
157 the Sham group. The analysis was applied to the largest sub-group of patients with similar lesion  
158 location, which was those whose non-dominant hemisphere was affected by a subcortical stroke,  
159 resulting in equal BCI (n = 6) and Sham (n = 6) group sizes.

### 160 BCI features

161 The features (electrode locations and spectral power frequencies) that were selected at each re-  
162 training of the classifier for the BCI group patients changed over the course of treatment in all patients  
163 (Supplementary Fig. 1). Early in the program, bilateral features provided the best classification, with a  
164 tendency towards ipsilesional (contralateral) features being selected by the final training of the  
165 classifier. While the features included power in both the alpha and beta frequencies throughout, alpha  
166 power continued to be relevant by the end of the treatment period. By week 4 or later, all classifiers  
167 included an alpha power feature. Only one patient had an ipsilateral beta feature by the end.

### 168 Clinical evaluation

169 Examining the FMA-UE scores before and after the program, an interaction was observed between  
170 *Time* and *Group* ( $F(1) = 8.03$ ,  $p = 0.030$ ) (Fig. 1). No other interactions were significant. A main effect  
171 of *Time* was also observed ( $F(1,6) = 8.93$ ,  $p = 0.024$ ). No other within-subject main effects were  
172 significant. No between-subject effects were significant. Post hoc pairwise comparisons showed a  
173 significant increase in FMA-UE score from pre- to post-treatment in the BCI group ( $p = 0.004$ ) but not  
174 in the Sham group ( $p = 0.77$ ). The scores did not differ between the groups pre-treatment ( $p = 0.81$ ),

175 and a trend towards a higher score in the BCI than the Sham group was seen post-treatment ( $p =$   
176 0.062).

177 Of the secondary clinical outcome measures, a trend towards a *Group x Time* interaction ( $F(1) = 4.97,$   
178  $p = 0.056$ ) and a main effect of *Time* ( $F(1) = 4.08, p = 0.078$ ) were only observed for the National  
179 Institute of Health (NIHSS) upper limb score.

180 When *Therapy start* (Acute, Subacute) was included as a between-subject factor, the only significant  
181 interaction remained *Time x Group* ( $F(1) = 6.66, p = 0.049$ ) (Fig. 2). Post hoc tests showed an increase  
182 in FMA-UE score in the BCI group ( $p = 0.010$ ) but not in the Sham group ( $p = 0.89$ ). The FMA-UE score  
183 increased in the BCI group from pre- to post-treatment when therapy was started in the acute (within  
184 one month of stroke:  $p = 0.016$ ) but not the subacute (one to six months post-stroke:  $p = 0.21$ ) phase,  
185 but the increase was not significant in the Sham group, starting in either the acute ( $p = 0.94$ ) or the  
186 subacute phase ( $p = 0.78$ ).

### 187 TMS

188 TMS measurements were available from patients with a subcortical stroke from both groups (BCI:  $n =$   
189 3; Sham:  $n = 3$ ). An interaction was observed between *Group* and *Time* ( $F(1) = 27.69, p = 0.034$ ) (Fig.  
190 3). There was no main effect of *Group* ( $F(1,2) = 9.12, p = 0.094$ ) or *Time* ( $F(1,2) = 1.36, p = 0.36$ ). Post  
191 hoc revealed a significant amplitude increase from pre- to post-treatment in the BCI group ( $p = 0.012$ )  
192 only (Sham group:  $p = 0.50$ ).

### 193 High-density EEG

194 Oscillatory spectral power differed between pre- and post-treatment in the BCI group ( $p = 0.036$ ), with  
195 a reduction in upper beta (15-23 Hz) oscillatory spectral power around 0.5 to 1.5 s following the  
196 movement cue over the ipsilesional motor cortex (at electrode C2), which was not seen in the Sham  
197 group (Fig. 4). Spectral power was compared before and after treatment for each patient on the  
198 contralateral (C2) and ipsilateral (C1) side to movement, at the time post-movement cue, at which the  
199 pre- to post-movement change was greatest (1.2 to 1.4 s) (Fig. 4). Beta power reduction over the  
200 treatment period was most consistent across individuals in the BCI group over the ipsilesional motor  
201 cortex, contralateral to movement (Fig. 5). The contralateral beta power after therapy correlated with  
202 the FMA-UE score ( $r(2) = 0.96, p = 0.044$ ) (Fig. 5). No significant correlation was observed in the Sham  
203 group nor in either group before therapy.

204 LRTC, quantified using the Hurst parameter, was lower after than before the treatment program in the  
205 BCI group in the beta frequency range according to pairwise T-tests (Fig. 6A, B). Averaging over the  
206 beta frequency range at which power changed over time in the BCI group (15-23 Hz) and over time, a  
207 reduction in LRTC was seen in the BCI group only (paired T-tests, BCI:  $T = -3.38, p = 0.043$ ; Sham:  $T =$   
208 0.19,  $p = 0.86$ ). While LRTC was higher after than before the program in the Sham group in the alpha  
209 frequency range (8-12 Hz), averaging over frequency and time, the difference was not significant  
210 (paired T-tests, BCI:  $T = -0.85, p = 0.46$ ; Sham:  $T = 0.52, p = 0.64$ ). The reduction in beta-LRTC was  
211 consistently observed at an individual patient level in the BCI group only, and the increase in alpha-  
212 LRTC was consistently seen in the Sham group only (Fig. 6C, D).

213 We examined EEG–EMG coherence in the time–frequency window in which spectral power changed  
214 from pre- to post-treatment in the BCI group (0.5-1.5 s; 15-23 Hz), at the electrode location over the  
215 contralateral primary motor cortex at which the power difference was greatest (C2). The EEG–EMG

216 coherence was greater after than before treatment in the BCI group (paired T-test:  $T = -3.45$ ,  $p = 0.041$ )  
217 but not in the Sham group ( $T = -0.073$ ,  $p = 0.95$ ) (Fig. 7).

## 218 **Discussion**

219 Greater motor recovery, reflected by improved FMA-UE scores, was seen in the group receiving BCI–  
220 FES, with stimulation temporally locked to oscillatory spectral power changes in the sensorimotor  
221 rhythm, compared to the Sham group, who received FES at times unrelated to oscillatory correlates of  
222 movement attempts. Recovery was greater if the BCI–FES therapy was started in the acute phase post-  
223 stroke. Neural correlates of improved functional connectivity between contralateral (ipsilesional)  
224 motor cortex in the BCI group included greater increases in TMS-induced MEP amplitudes and in  
225 corticomuscular coherence in the beta frequency range pre- to post-treatment than in the Sham group.  
226 Moreover, movement-associated beta spectral power reduction was more pronounced post-  
227 treatment in the BCI than the Sham group, commensurate with a reduction in compensatory activity.  
228 Finally, long-range temporal correlation within beta oscillations was also reduced post-treatment in  
229 the BCI group, suggesting that a subcritical state could be advantageous to motor recovery. Our  
230 findings are consistent with the proposal that FES delivery in a tight temporal window coupled with  
231 movement attempts using a BCI could improve post-stroke motor recovery, particularly if started early.  
232 Multiple neural correlates of motor recovery were modulated by the treatment program in BCI group,  
233 supporting the notion that timing FES delivery according to sensorimotor electrophysiological  
234 correlates of movement attempts could have a specific impact on recovery processes.

235 Few studies have investigated the potential impact of using BCI-FES early post-stroke<sup>13,38,39</sup>. Of the  
236 eight patients receiving BCI-FES in a partial crossover design study, four commenced treatment in the  
237 subacute phase, from 2-6 months post-stroke, with three in the BCI-FES and one in a control group  
238 receiving no FES<sup>39</sup>. Handedness, hemisphere affected, and lesion location varied. All three BCI patients  
239 showed improved motor function after treatment, while the control patient, whose impairment was  
240 also the most severe, did not. In another study with a partial crossover design, in which five of the 21  
241 patients (mainly with stroke affecting the non-dominant hemisphere, including subcortical and cortical  
242 stroke) commenced treatment in the subacute stage, a clinically relevant improvement was seen in  
243 three of these patients<sup>13</sup>. A further study, involving seven right-handed patients with mainly subcortical  
244 stroke receiving BCI-FES in the acute/subacute phase, also showed greater motor recovery and  
245 enhanced sensorimotor rhythm desynchronization on the affected side after BCI-FES, which was not  
246 observed in the control group receiving FES unrelated to EEG features<sup>38</sup>. The improvements following  
247 BCI-FES in patients early post-stroke in these studies are consistent with our findings. Moreover, our  
248 preliminary analyses indicated that the increases in FMA and in beta desynchronization, as well as the  
249 reduction in beta LRTC, were observable in all four BCI group patients individually<sup>40</sup>. The small numbers  
250 of patients included at an early stage post-stroke highlights the importance of meta-analyses  
251 combining the findings from different studies.

252 Comparing alpha and beta oscillatory power pre- and post-treatment showed an increase in  
253 ipsilesional beta desynchronization in the BCI group. On the other hand, alpha power provided more  
254 ipsilesional classification features by the end than at the start of the treatment program. Enhanced  
255 ipsilateral beta and also alpha desynchronization on motor imagery have been reported following BCI-  
256 based neurofeedback training in subacute stroke patients<sup>41</sup>. Modulations of alpha and beta power  
257 have been postulated to enable selection of task-relevant neural assemblies, with separate roles  
258 proposed for alpha and beta oscillations during goal-directed actions<sup>42</sup>. A decrease in contralateral  
259 sensorimotor beta power in healthy participants on increasing action selection difficulty was suggested

260 to reflect disinhibition of cortical regions engaged in determining movement parameters, while  
261 increased ipsilateral alpha power was proposed to facilitate disengagement of task-unrelated neuronal  
262 populations<sup>42</sup>. Reinforcing alpha modulation associated with movement attempts, through providing  
263 visual and proprioceptive feedback generated by BCI-FES-induced movement using alpha power as a  
264 classifier feature, could have facilitated synaptic strengthening or maintenance of neuronal networks  
265 oscillating in the alpha frequency range involved in movement generation. Reducing the selection of  
266 beta power features for classification could have reduced the integrity of networks oscillating in the  
267 beta range. We note that greater pre-treatment ipsilesional alpha desynchronization has been  
268 associated with better outcome in chronic stroke patients, with increased desynchronization over a  
269 BCI-training program correlating with greater motor recovery<sup>19</sup>. A pre- to post-treatment change in  
270 movement-related sensorimotor oscillations in the BCI group here is consistent with a modulatory  
271 effect of BCI-FES on the sensorimotor rhythm.

272 We observed a reduction in LRTC in beta oscillations in the BCI group post- compared with pre-  
273 treatment. LRTC has been proposed to reflect neuronal systems close to a critical state, allowing fast  
274 reorganization of functional neural networks in response to changing demands. Better performance in  
275 an attentional task has been found to be associated with lower beta LRTC than at rest, and it was  
276 postulated that performance in tasks requiring sustained attention benefits from a sub-critical state<sup>43</sup>.  
277 LRTC in alpha band oscillations is also reduced following perturbation by a stimulus and on  
278 movement<sup>33,44</sup>. LRTC was not examined in the beta band in these studies, however. Our finding of  
279 reduced LRTC post-treatment in the BCI group, who had shown better motor recovery than the Sham  
280 group, suggests moving to a sub-critical state is associated with improved motor function and could be  
281 induced by BCI-FES trained using the sensorimotor rhythm.

282 Pre- with post-treatment comparison of electrophysiological markers differed on the contralateral  
283 (ipsilesional) side. An fMRI meta-analysis found that while contralesional motor cortical involvement  
284 is common, an eventual predominance of ipsilesional activity is associated with better motor  
285 outcome<sup>32</sup>. While lateralization of sensorimotor activity during post-stroke recovery to the  
286 contralesional hemisphere has been associated with better motor outcomes in a cohort including  
287 subcortical and cortical stroke patients<sup>45</sup>, better recovery has been reported with ipsilesional  
288 lateralization following subcortical stroke<sup>11,32,46</sup>.

289 The main limitations of this study are associated with the early timing of the intervention and its impact  
290 on patient numbers. The most significant recovery post-stroke is seen in the first few weeks<sup>3</sup>,  
291 suggesting that intervention at this time may offer a window period with heightened neural plasticity,  
292 potentially enhancing facilitation of motor recovery. However, multiple factors contribute to the  
293 limited patient numbers included in BCI studies in early post-stroke patients<sup>13,38,39</sup>. Extensive  
294 investigations and treatments are frequently required on hospital admission, presenting a challenge  
295 to study recruitment. Moreover, co-existing medical conditions, often associated with the stroke, in  
296 this patient group can impede treatment program completion. Finally, spontaneous post-stroke  
297 recovery is most common in the acute phase, in the first days to weeks post-stroke<sup>13</sup>. These limitations  
298 are common across centers, underlining the need for multi-center studies and meta-analyses to  
299 address the efficacy of rehabilitation approaches in this group.

300 The non-dominant hemisphere was affected in the majority of patients able to participate, due to  
301 aphasia being an exclusion criterion. The laterality of brain activity associated with movement depends  
302 on whether the dominant or non-dominant side is affected and the handedness of the patient. Group  
303 level statistical analyses comparing pre- and post-treatment activity required these factors to be



304 uniform across patients. A tendency to use the non-dominant hand less may impede use-related  
305 spontaneous recovery, which could play a role in the benefits seen following BCI-FES in this patient  
306 group. Further studies directly comparing groups in whom the non-dominant and dominant  
307 hemispheres affected are needed, but again, the group sizes required will necessitate large-scale multi-  
308 center patient recruitment to reach the necessary patient numbers in each group.

309 Our findings support the proposal that using a BCI to trigger FES temporally coupled with movement  
310 attempts detected in motor cortical oscillations enhances post-stroke motor recovery, especially  
311 starting early after stroke. The electrophysiological findings suggest BCI-driven FES supports re-  
312 establishment of movement-associated processing on the ipsilesional side and a transition towards a  
313 subcritical state as contributing to the mechanism of Hebbian facilitation.

## 314 **Methods**

### 315 Patients

316 The patients were a subgroup of the Magdeburg patient cohort in an international, multi-center  
317 double-blind, randomized controlled study, which comprised two registered trials with the same study  
318 protocol but differing target patient populations. The first trial targeted patients in the acute phase  
319 post-stroke (German Clinical Trials Register: DRKS00007832) and the second included patients in the  
320 subacute phase (DRKS00011522). Patients were recruited following acute hospital admission post-  
321 stroke or on transfer to the rehabilitation center, from the University Hospital Magdeburg stroke ward  
322 and the Neurorehabilitation Centre, Median Hospital Magdeburg, Germany, respectively. The study  
323 protocol was approved by the Local Ethics Committee of the University Hospital, Magdeburg, Germany  
324 and performed in accordance with the principles of the Declaration of Helsinki. All patients discussed  
325 study participation and the possibility of withdrawing from the study at any time, without a need to  
326 provide a reason, with CMSR, and subsequently provided informed, written consent to participation.

### 327 *Inclusion criteria*

328 The primary inclusion criterion was upper limb paresis following stroke affecting wrist extension, with  
329 a Medical Research Council Power Test score < 3, persisting >24 hours, and still present on recruitment.  
330 The acute group was recruited less than 1 month and the subacute group 1-6 months after stroke  
331 onset. Patients were required to be a minimum of 18 years of age, with no upper age limit. Diagnosis  
332 was confirmed using magnetic resonance imaging (MRI) or computerized tomography (CT), and  
333 patients with thrombotic or haemorrhagic stroke were included.

### 334 *Exclusion criteria*

335 The ability to understand the therapy instructions was a prerequisite, both to fulfill the requirement  
336 of provision of informed, written consent, and to enable active participation. Exclusion criteria were  
337 therefore a score <25 on the Montreal Cognitive Assessment<sup>47</sup> or severe aphasia, precluding active  
338 discussion of the instructions. Further exclusion criteria were severe hemi-neglect, depression  
339 (Hospital Anxiety and Depression Scale: HADS-total >15/21)<sup>48</sup>, fatigue (Fatigue Severity Scale > 36/63,  
340 i.e., > 4/7 on 9 items)<sup>49</sup>, pain in the neck/shoulder/arm (Pain Scale > 5/10)<sup>50</sup>, or a history of epilepsy.  
341 Other exclusion criteria were medical instability (orthostatic hypotension, sepsis, end-stage renal  
342 failure, severe visual impairment, fixed joint contractures, a skin condition that could be worsened  
343 through electrode placement), and taking certain regular medication (L-dopa, amantadine).

344

345 BCI-FES

346 On recruitment, patients were pseudorandomly allocated to the BCI or Sham group. The groups were  
347 counterbalanced according to the following factors: *Age*, *Sex*, *Lesion Side*, *Lesion Site* (subcortical,  
348 cortical), *Lesion Type* (ischaemic, haemorrhagic), and *Pre-treatment FMA*, to control for potential  
349 confounding factors. Patients were added sequentially to the database containing these factors and  
350 also the factor *Group Allocation*. The first four patients were allocated to the BCI group, so that FES  
351 delivery parameters would be available for generating comparable parameters for the Sham group.  
352 Frane's algorithm was then applied to the database to determine group allocation. An index of  
353 imbalance of each factor among patients so far recruited was calculated, based on each possible group  
354 allocation for the next patient. The index was a p-value from testing the hypothesis that the factor did  
355 not differ between groups. The Chi-square-goodness-of-fit test was used for *Group Allocation*, the  
356 Wilcoxon rank sum test for *Age* and *Pre-treatment FMA*, and the chi-square test for the remaining  
357 factors. For each possible group allocation, the largest imbalance was selected and converted to a  
358 probability of *Group Allocation* to each group by normalization. With each patient allocation, the most  
359 unbalanced factor at that time point was thus considered. The patients, therapists, and evaluating  
360 clinicians were blinded to group allocation.

361 Sixteen EEG electrodes were placed bilaterally over motor cortical regions using a customized  
362 electrode cap, with electrode positions based on the 10-20 international system as follows: Fz, FC3,  
363 FC1, FCz, FC2, FC4, C3, C1, Cz, C2, C4, CP3, CP1, CPz, CP2, and CP4. The reference electrode location  
364 was the right mastoid, and the ground electrode was at AFz. Selective electrode coverage was used,  
365 as our aim was to base FES timing on motor cortical activity, and the reduced electrode number  
366 enabled rapid application, which was important for daily electrode application, to minimize therapist  
367 time and maximize compliance. EEG signals were recorded at a sampling rate of 512 Hz using a  
368 g.USBamp V2.14.07 amplifier (g.tec, Austria).

369 Patients received a maximum of five sessions per week, with sessions occurring on different days. The  
370 total number of possible sessions depended on the length of the patients' stay at the rehabilitation  
371 center. All patients received a minimum of three weeks of rehabilitation, and a two-week extension  
372 was granted in certain cases by the individual state or private health insurance company. A mean of  
373 18.8 [SD 5.7] treatment sessions were performed. Due to the variation, analyses of clinical outcomes  
374 were corrected for the number of sessions received.

375 An initial training session was carried out to record EEG data during attempted movement and at rest,  
376 which were used to train the classifier. Patients were seated comfortably in front of a computer screen,  
377 with a table in front of them on which to rest their forearms, palms down, with flexed elbows. When  
378 a green up-arrow was presented, patients were instructed to attempt to extend the wrist of the paretic  
379 limb. To provide analogous visual stimulation for both trial types, a red down-arrow was presented  
380 when patients were to remain at rest. An upwardly moving bar was presented as visual feedback during  
381 movement attempts, and a downwardly moving bar was present during rest. The cue to begin each  
382 trial was presented at 0 s. Four to six five-minute blocks were performed. Feature and selection and  
383 classification were performed in accordance with the previously reported chronic stroke study<sup>12</sup>.  
384 Following Laplacian-based spatial filtering, the Welch periodogram was applied to calculate the power  
385 spectral density at each electrode in 2 Hz bands from 8-30 Hz in 1 s sliding windows, shifting at 62.5  
386 ms intervals (i.e., 16 times per second). Canonical variates analysis was used to identify up to 10  
387 features for initial classifier training<sup>51</sup>. The trials were labelled as movement attempt or rest to provide  
388 input to train the Gaussian classifier using gradient-descent supervised learning. During the therapy,

389 the probability was determined that a particular power spectral density value belonged to the  
390 movement attempt or rest trial class. When the classification threshold was not exceeded, a leaky  
391 integrator was used to smooth the ongoing output of the classifier. FES was triggered at the time point  
392 at which the probabilities integrated over time reached a threshold. If neither class was determined  
393 over a maximum 7 s trial, the trial was terminated, and the next one started. EEG data recorded during  
394 the therapy sessions were used to retrain the classifier each week, to account for changes over the  
395 course of the treatment.

396 Each subsequent therapy session comprised 3-7 blocks, according to fatigue levels, and lasted 10-25  
397 minutes, including breaks. Fifteen movement attempts were made per block. For each therapy session,  
398 the EEG electrode cap was again applied, and two stimulating electrodes were placed over the  
399 extensor digitorum communis of the paretic forearm for inducing or assisting wrist extension by  
400 applying FES using a RehaStim stimulation device (Hasomed, Germany). EEG data were recorded  
401 continuously, with online classification 16 times per second. When a movement attempt was detected,  
402 FES was delivered. To balance the stimulation frequency between the groups, a BCI group patient was  
403 arbitrarily selected for each Sham group patient, and the corresponding frequency of stimulation was  
404 applied.

#### 405 Clinical evaluation

406 A series of clinical evaluations was made to determine potential differences between the groups in  
407 terms of direct physical assessment and also impact on ability to perform daily tasks. The Edinburgh  
408 Handedness Inventory (EHI) was used to evaluate handedness.

409 The Fugl-Meyer Assessment upper extremity (FMA-UE) score (max. 66)<sup>52</sup> was the primary outcome  
410 measure. A repeated measures ANOVA with the between-subject factor *Group* (BCI, Sham), the within-  
411 subject factor *Time* (pre- and post-treatment), and the covariates *Age*, *Sex*, *Days Post-Stroke*, and *Days*  
412 *of Therapy* (i.e., number of treatment sessions) was used to compare the difference between FMA-UE  
413 score changes over the program between the groups. A repeated measures ANOVA was also applied  
414 including *Therapy start* (acute, subacute) as an additional between-subject factor.

415 A range of secondary endpoints was determined, to enable a detailed exploration of any potential  
416 differences between the groups. They included the Medical Research Council Power Test, the  
417 Rivermead Test, the Barthel Index, the National Institute of Health Stroke Scale (motor: Arm), the  
418 European Stroke Scale, the Modified Ashworth Scale (spasticity), the Goal Attainment Assessment, and  
419 the Stroke Impact Scale.

#### 420 TMS

421 TMS was performed as a part of routine clinical monitoring from patients who fulfilled the inclusion  
422 and exclusion criteria relating to high magnetic field exposure. Before and after treatment, TMS was  
423 delivered to EEG location C4, over the primary motor cortex, while electromyographical signals (EMG)  
424 were simultaneously recorded over the affected (left) extensor digitorum communis. TMS was  
425 commenced at 70% of capacity and increased repeatedly by 10%, until the maximum motor evoked  
426 potential (MEP) amplitude was observed. The change in MEP from before to after treatment was  
427 compared between groups using a repeated measures ANOVA, with the between-subject factor *Group*  
428 (BCI, Sham) and the within-subject factor *Time* (before, after), correcting for the covariates, *Age* at  
429 stroke onset and *Sex*.

## 430 High-density EEG

431 High-density EEG data were recorded using a BrainAmpDC amplifier (Brain Products GmbH, Germany)  
432 from 64 channels (sampling rate: 500 Hz), simultaneously with electromyographic (EMG) data from  
433 electrodes placed over extensor digitorum communis of the affected limb during movement attempts,  
434 in twelve runs pre- and post-treatment. Each run comprised 10 movement and 5 rest trials in a  
435 pseudorandom order. Trials were presented using Presentation software (Version 18.2,  
436 Neurobehavioral Systems, Berkeley, CA, USA), analogously to movement cue presentation during the  
437 treatment program. The data were analyzed using custom Matlab scripts, EEGLab<sup>53</sup>, and FieldTrip<sup>54</sup>.  
438 Consistent with the clinical analyses, EEG data were analyzed from the patients with a non-dominant  
439 hemisphere, subcortical stroke. To enable electrode level comparison, we focused on patients who  
440 were purely right-handed (N = 8; BCI: n = 4, Sham: n = 4).

441 The EEG data were checked for internal consistency, then a notch (49–51 Hz) and a bandpass (1-200  
442 Hz) filter were applied. The channels from each patient were then visually inspected and marked for  
443 ocular, EMG, and other artifacts. If more than 10 % of the data in a given channel were marked, the  
444 relevant channel was removed and replaced by spline-interpolated data from neighboring channels.  
445 The data were then re-referenced to an average reference, before being epoched according to  
446 movement cue presentation (at time = 0 s) with a window of -2 s to 2.998 s (2500 frames). Epochs  
447 containing artifacts, determined by visual inspection, were excluded from subsequent analysis by JK  
448 and RK, supervised by CMSR. Independent component analysis (ICA) was applied, and components  
449 containing eye-blink, eye movement, and muscle artifacts were identified by JK and RK on visual  
450 inspection and removed, followed by back-projection of the ICs to the electrode space. The EMG data  
451 were epoched with the EEG data but separately notch- and high-pass filtered (10 Hz cut-off), then  
452 rectified. The data were further epoched to the times relevant for the subsequent analyses.

453 Time-frequency decomposition was carried out through convolution with 5-cycle Morlet wavelets  
454 from 4 to 31 Hz. Change in oscillatory spectral power from pre- to post-treatment was compared for  
455 each group. Paired T-tests were applied to each time-frequency point, with a threshold of  $p = 0.05$ ,  
456 followed by cluster-based permutation tests with 500 randomizations. We then examined the change  
457 in individual patient beta spectral power pre- to post-treatment on an individual level over motor  
458 cortex ipsi- and contralateral to movement of the affected hand for each group, followed by calculation  
459 of Pearson's correlation coefficient between post-treatment contralateral beta spectral power and  
460 FMA-UE.

461 Coherence was calculated between the EMG signal recorded over the extensor digitorum communis  
462 during movement attempts and each EEG channel in the time–frequency window (0.5 to 1.5 s, 15-23  
463 Hz) at which the pre- to post-treatment spectral power reduction differed between the BCI and sham  
464 groups. The EMG and EEG data were Fourier-transformed, with multitaper spectral smoothing, and  
465 the cross spectra were calculated based on the phase difference between the EMG and each EEG  
466 signal. The change in EEG–EMG coherence from pre- to post-treatment was compared for each group  
467 over contralateral motor cortex, at electrode C2, where power modulation was greatest, using paired  
468 T-tests.

469 Long-range temporal correlation (LRTC) was calculated using detrended fluctuation analysis (DFA). DFA  
470 was developed, because autocorrelation function analyses may yield spurious long-range correlations  
471 when the data are non-stationary. Evaluation of the decay in auto-correlation between remote parts  
472 of a non-stationary data sequence using DFA<sup>55</sup> is therefore applicable in EEG data<sup>33</sup>. LRTC can be  
473 quantified in EEG data in either the time or the frequency domain, the former by fitting the power law

474 to the autocorrelation, and the latter by estimating the slope of the 1/f power spectrum on a log–log  
475 scale and computing the scaling exponent. DFA provides a more practical and most common approach  
476 to quantifying the degree of temporal dependency in non-stationary signals, captured in the Hurst  
477 exponent (H), and has been shown to be consistently related to both of those approaches<sup>56</sup>. In EEG  
478 signals, the degree of self-similarity within the time series has previously been quantified based on  
479 power law scaling, by applying least squares linear regression to determine the slope of a log–log plot  
480 of detrended fluctuations against window size (time scale) to yield  $H^{44,55,57}$ . LRTC is deemed present  
481 when H is between 0.5 and 1.

482 LRTC in alpha and beta oscillations partially overlaps topologically with the distribution of spectral  
483 power, and alpha and beta power and LRTC correlate weakly<sup>34</sup>. We therefore evaluated LRTC at the  
484 electrode location at which power differences from pre- to post-treatment differed most between the  
485 BCI and Sham groups. The data were time–frequency decomposed using the wavelet transform with 5  
486 cycle wavelets, amplitudes were extracted for alpha and beta frequencies (9–30 Hz), and H was  
487 calculated in 1 Hz steps. Long signal segments are needed to estimate H in narrowband signals<sup>58</sup>, so  
488 we concatenated the movement trials before applying DFA, following the approach of Wairagkar and  
489 colleagues<sup>44</sup>, as the DFA scaling exponent is not affected by stitching data together<sup>57,59</sup>. The minimum  
490 available number of trials for a given patient was 20, so 20 sequential trials were concatenated for  
491 each patient. The LRTC was then calculated over a 47.5 s sliding window in 50 ms steps, and the LRTC  
492 value was assigned to the first time point of each window. Paired T-tests were applied to compare  
493 LRTC before and after treatment for each group across time and the alpha and beta frequency ranges,  
494 as these frequencies were used as classifier features during the treatment program.

#### 495 **Author contributions statement**

496 CMSR: wrote first draft of manuscript; JK, CR, SP, SV, TH, SD, RTK, HH, HJH, MS, JRM, CMSR: study  
497 concept and design; CMSR: study coordination; JK, RK, SV, TH, AS, JL, AH, MG, HJH, SL, MS, CMSR:  
498 patient recruitment; CMSR: patient consent; JK, RK, SV, TH, AH, SL, CMSR: clinical evaluation for  
499 inclusion; JK, RK, SV, TH, AH, SL: blinded pre- and post-therapy clinical evaluation; SV, TH, AH, MG, HJH,  
500 SL, MS: clinical management; AS, JL, AH, SL, MS, CMSR: therapy coordination; CR, SP, JRM, CMSR: group  
501 allocation, therapy preparation, and implementation; CR, CMSR: instructed therapists in treatment  
502 implementation; SP, JRM: wrote group allocation and classifier software; JK, RK, CMSR:  
503 electrophysiological recording; JK, RK, CMSR: electrophysiological and TMS analyses; JK, CR, SJN, ICT,  
504 RTK, CMSR: data interpretation. All authors approved the final manuscript.

#### 505 **Competing Interests statement**

506 None declared.

#### 507 **Acknowledgements**

508 The authors would like to thank Anne-Katrin Baum, Manuela Reichwald, and Angelika Klemme for  
509 support in data acquisition and Arne Leukert and Luise Ebeling-Jung for carrying out the therapy  
510 sessions. We also thank the patients for their participation.

#### 511 **Data availability**

512 The datasets analyzed during the current study are available from the corresponding author on  
513 reasonable request.

514 **References**

- 515 1. Kyu, H., Abate, D., Abate, K. & Al., E. Global, regional, and national disability-adjusted life-  
516 years (DALYs) for 359 diseases and injuries and healthy life expectancy (HALE) for 195  
517 countries and territories, 1990 – 2017: a systematic analysis for the Global Burden of Disease  
518 Study 2017. *Lancet* **392**, 1859–1922 (2018).
- 519 2. Lawrence, E. S. *et al.* Estimates of the prevalence of acute stroke impairments and disability in  
520 a multiethnic population. *Stroke* **32**, 1279–1284 (2001).
- 521 3. Grefkes, C. & Fink, G. R. Recovery from stroke: current concepts and future perspectives.  
522 *Neurol Res Pract* **2**, (2020).
- 523 4. Murphy, T. H. & Corbett, D. Plasticity during stroke recovery: From synapse to behaviour.  
524 *Nature Reviews Neuroscience* vol. 10 861–872 Preprint at <https://doi.org/10.1038/nrn2735>  
525 (2009).
- 526 5. Takeuchi, N. & Izumi, S. I. Maladaptive plasticity for motor recovery after stroke: mechanisms  
527 and approaches. *Neural Plasticity* vol. 2012 Preprint at <https://doi.org/10.1155/2012/359728>  
528 (2012).
- 529 6. Su, F. & Xu, W. Enhancing brain plasticity to promote stroke recovery. *Frontiers in Neurology*  
530 vol. 11 Preprint at <https://doi.org/10.3389/fneur.2020.554089> (2020).
- 531 7. Soekadar, S. R., Birbaumer, N., Slutzky, M. W. & Cohen, L. G. Brain–machine interfaces in  
532 neurorehabilitation of stroke. *Neurobiol Dis* **83**, 172–179 (2015).
- 533 8. Dokkum, L. E. H. Van, Ward, T. & Laffont, I. Brain computer interfaces for neurorehabilitation  
534 – its current status as a rehabilitation strategy post-stroke. *Ann Phys Rehabil Med* **58**, 3–8  
535 (2015).
- 536 9. Cramer, S. C. *et al.* Harnessing neuroplasticity for clinical applications. *Brain* vol. 134 1591–  
537 1609 Preprint at <https://doi.org/10.1093/brain/awr039> (2011).
- 538 10. Takeuchi, N. & Izumi, S. I. Combinations of stroke neurorehabilitation to facilitate motor  
539 recovery: Perspectives on Hebbian plasticity and homeostatic metaplasticity. *Front Hum*  
540 *Neurosci* **9**, (2015).
- 541 11. Ramos-Murguialday, A. *et al.* Brain-machine-interface in chronic stroke rehabilitation: a  
542 controlled study. *Ann. Neurol.* **74**, 100–108 (2014).
- 543 12. Biasucci, A. *et al.* Brain-actuated functional electrical stimulation elicits lasting arm motor  
544 recovery after stroke. *Nat Commun* **9**, 1–13 (2018).
- 545 13. Remsik, A. B. *et al.* Behavioral outcomes following brain computer interface intervention for  
546 upper extremity rehabilitation in stroke: a randomized controlled trial. *Front Neurosci* **12**, 752  
547 (2018).
- 548 14. Wu, Q. *et al.* Brain functional networks study of subacute stroke patients with upper limb  
549 dysfunction after comprehensive rehabilitation including BCI training. *Front Neurol* **10**, (2020).
- 550 15. Maulden, S. A., Gassaway, J., Horn, S. D., Smout, R. J. & DeJong, G. Timing of initiation of  
551 rehabilitation after stroke. *Arch Phys Med Rehabil* **86**, 34–40 (2005).
- 552 16. Hordacre, B. *et al.* Evidence for a window of enhanced plasticity in the human motor cortex  
553 following ischemic stroke. *Neurorehabil Neural Repair* **35**, 307–320 (2021).

- 554 17. Remsik, A. *et al.* A review of the progression and future implications of brain-computer  
555 interface therapies for restoration of distal upper extremity motor function after stroke.  
556 *Expert Rev Med Devices* **4440**, 17434440.2016.1174572 (2016).
- 557 18. Krueger, J. *et al.* Brain-computer interface-driven functional electrical stimulation for motor  
558 rehabilitation following stroke. *Klinische Neurophysiologie* **51**, (2020).
- 559 19. Ray, A. M., Figueiredo, T. D. C., López-Larraz, E., Birbaumer, N. & Ramos-Murguialday, A. Brain  
560 oscillatory activity as a biomarker of motor recovery in chronic stroke. *Hum Brain Mapp* **41**,  
561 1296–1308 (2020).
- 562 20. Krauth, R. *et al.* Cortico-muscular coherence is reduced acutely post-stroke and increases  
563 bilaterally during motor recovery: a pilot study. *Front Neurol* **10**, (2019).
- 564 21. Pfurtscheller, G. & Lopes da Silva, F. Event-related EEG/MEG synchronization and  
565 desynchronization: basic principles. *Clin. Neurophysiol.* **110**, 1842–57 (1999).
- 566 22. Sweeney-Reed, C. M. & Nasuto, S. J. Detection of neural correlates of self-paced motor  
567 activity using empirical mode decomposition phase locking analysis. *J Neurosci Methods* **184**,  
568 54–70 (2009).
- 569 23. Pfurtscheller, G., Brunner, C., Schoegl, A. & Lopes da Silva, F. Mu rhythm (de)synchronization  
570 and EEG single-trial classification of different motor imagery tasks. *Neuroimage* **31**, 153–9  
571 (2006).
- 572 24. López-Larraz, E. *et al.* Event-related desynchronization during movement attempt and  
573 execution in severely paralyzed stroke patients: An artifact removal relevance analysis.  
574 *Neuroimage Clin* **20**, 972–986 (2018).
- 575 25. Chaudhary, U., Birbaumer, N. & Curado, M. R. Brain-Machine Interface (BMI) in paralysis. *Ann*  
576 *Phys Rehabil Med* **58**, 9–13 (2015).
- 577 26. Vukelić, M., Belardinelli, P., Guggenberger, R., Royter, V. & Gharabaghi, A. Different oscillatory  
578 entrainment of cortical networks during motor imagery and neurofeedback in right and left  
579 handers. *Neuroimage* **195**, 190–202 (2019).
- 580 27. Stancak Jr., A. & Pfurtscheller, G. The effects of handedness and type of movement on the  
581 contralateral preponderance of mu-rhythm desynchronisation. *Electroencephalogr Clin*  
582 *Neurophysiol* **99**, 174–182 (1996).
- 583 28. Tzourio Mazoyer, N. *et al.* Between-hand difference in ipsilateral deactivation is associated  
584 with hand lateralization: fMRI mapping of 284 volunteers balanced for handedness. *Front*  
585 *Hum Neurosci* **9**, (2015).
- 586 29. Gao, J. *et al.* Hemispheric difference of regional brain function exists in patients With acute  
587 stroke in different cerebral hemispheres: a resting-state fMRI study. *Front Aging Neurosci* **13**,  
588 (2021).
- 589 30. Liew, S. L. *et al.* Laterality of poststroke cortical motor activity during action observation is  
590 related to hemispheric dominance. *Neural Plast* **2018**, (2018).
- 591 31. Buetefisch, C. M. Role of the contralesional hemisphere in post-stroke recovery of upper  
592 extremity motor function. *Frontiers in Neurology* vol. 6 Preprint at  
593 <https://doi.org/10.3389/fneur.2015.00214> (2015).

- 594 32. Rehme, A. K., Eickhoff, S. B., Rottschy, C., Fink, G. R. & Grefkes, C. Activation likelihood  
595 estimation meta-analysis of motor-related neural activity after stroke. *Neuroimage* **59**, 2771–  
596 2782 (2012).
- 597 33. Linkenkaer-Hansen, K., Nikulin, V., Palva, J., Kalia, K. & Ilmoniemi, R. Stimulus-induced change  
598 in long-range temporal correlations and scaling behaviour of sensorimotor oscillations. *Eur. J.*  
599 *Neurosci.* **19**, 203–211 (2004).
- 600 34. Nikulin, V. v. & Brismar, T. Long-range temporal correlations in electroencephalographic  
601 oscillations: Relation to topography, frequency band, age and gender. *Neuroscience* **130**, 549–  
602 558 (2005).
- 603 35. Varela, F., Lachaux, J., Rodriguez, E. & Martinerie, J. The brainweb: phase synchronization and  
604 large-scale integration. *Nat. Rev. Neurosci.* **2**, 229–39 (2001).
- 605 36. Sweeney-Reed, C. M. *et al.* Corticothalamic phase synchrony and cross-frequency coupling  
606 predict human memory formation. *Elife* **3**, e05352 (2014).
- 607 37. Makeig, S. *et al.* Dynamic brain sources of visual evoked responses. *Science (1979)* **295**, 690–  
608 694 (2002).
- 609 38. Li, M. *et al.* Neurophysiological substrates of stroke patients with motor imagery-based brain-  
610 computer interface training. *International Journal of Neuroscience* **124**, 403–415 (2014).
- 611 39. Young, B. M. *et al.* Changes in functional brain organization and behavioral correlations after  
612 rehabilitative therapy using a brain-computer interface. *Front Neuroeng* **7**, (2014).
- 613 40. Krueger, J. *et al.* Functional electrical stimulation driven by a brain-computer interface in  
614 acute and subacute stroke patients impacts beta power and long-range temporal correlation.  
615 in *2022 IEEE Workshop on Complexity in Engineering, COMPENG 2022* (Institute of Electrical  
616 and Electronics Engineers Inc., 2022). doi:10.1109/COMPENG50184.2022.9905448.
- 617 41. Pichiorri, F. *et al.* Brain-computer interface boosts motor imagery practice during stroke  
618 recovery. *Ann Neurol* **77**, 851–865 (2015).
- 619 42. Brinkman, L., Stolk, A., Dijkerman, H. C., De Lange, F. P. & Toni, I. Distinct roles for alpha- and  
620 beta-band oscillations during mental simulation of goal-directed actions. *Journal of*  
621 *Neuroscience* **34**, 14783–14792 (2014).
- 622 43. Irrmischer, M., Poil, S. S., Mansvelder, H. D., Intra, F. S. & Linkenkaer-Hansen, K. Strong long-  
623 range temporal correlations of beta/gamma oscillations are associated with poor sustained  
624 visual attention performance. *European Journal of Neuroscience* **48**, 2674–2683 (2018).
- 625 44. Wairagkar, M., Hayashi, Y. & Nasuto, S. J. Dynamics of long-range temporal correlations in  
626 broadband EEG during different motor execution and imagery tasks. *Front Neurosci* **15**,  
627 660032 (2021).
- 628 45. Young, B. M. *et al.* Changes in functional brain organization and behavioral correlations after  
629 rehabilitative therapy using a brain-computer interface. *Front Neuroeng* **7**, 15 (2014).
- 630 46. Tombari, D. *et al.* A longitudinal fMRI study: In recovering and then in clinically stable sub-  
631 cortical stroke patients. *Neuroimage* **23**, 827–839 (2004).
- 632 47. Nasreddine, Z. S. *et al.* The Montreal Cognitive Assessment, MoCA: a brief screening tool for  
633 mild cognitive impairment. *J Am Geriatr Soc* **53**, 695–699 (2005).



- 634 48. Sagen, U. *et al.* Screening for anxiety and depression after stroke: comparison of the Hospital  
635 Anxiety and Depression Scale and the Montgomery and Åsberg Depression Rating Scale. *J*  
636 *Psychosom Res* **67**, 325–332 (2009).
- 637 49. Cumming, T. B., Packer, M., Kramer, S. F. & English, C. The prevalence of fatigue after stroke: a  
638 systematic review and meta-analysis. *International Journal of Stroke* **11**, 968–977 (2016).
- 639 50. Radbruch, L. *et al.* Validation of the German version of the Brief Pain Inventory. *J Pain*  
640 *Symptom Manage* **18**, 180–187 (1999).
- 641 51. Galán, F., Ferrez, P. W., Oliva, F., Guàrdia, J. & Millán, J. D. R. Feature extraction for multi-class  
642 BCI using canonical variates analysis. in *2007 IEEE International Symposium on Intelligent*  
643 *Signal Processing, WISP* (2007). doi:10.1109/WISP.2007.4447615.
- 644 52. Fugl-Meyer, A., Jääskö, L., Leyman, I., Olsson, S. & Steglind, S. The post-stroke hemiplegic  
645 patient. 1. A method for evaluation of physical performance. *Scand J Rehabil Med* **7**, 13–31  
646 (1975).
- 647 53. Delorme, A. & Makeig, S. EEGLAB: an open source toolbox for analysis of single-trial EEG  
648 dynamics including independent component analysis. *J Neurosci Methods* **134**, 9–21 (2004).
- 649 54. Oostenveld, R., Fries, P., Maris, E. & Schoffelen, J. M. FieldTrip: Open source software for  
650 advanced analysis of MEG, EEG, and invasive electrophysiological data. *Comput Intell Neurosci*  
651 **156869**, (2011).
- 652 55. Peng, C.-K., Havlin, S., Stanley, H. E. & Goldberger, A. Quantification of scaling exponents and  
653 crossover phenomena in nonstationary heartbeat time series. *Chaos* **5**, 82–87 (1995).
- 654 56. Rangarajan, G. & Ding, M. Integrated approach to the assessment of long range correlation in  
655 time series data. *Phys. Rev. E Stat. Phys.* **61**, 4991–5001 (2000).
- 656 57. Botcharova, M., Berthouze, L., Brookes, M. J., Barnes, G. R. & Farmer, S. F. Resting state MEG  
657 oscillations show long-range temporal correlations of phase synchrony that break down  
658 during finger movement. *Front Physiol* **6**, (2015).
- 659 58. Linkenkaer-Hansen, K., Nikouline, V. v., Palva, J. M. & Ilmoniemi, R. J. Long-range temporal  
660 correlations and scaling behavior in human brain oscillations. *Journal of Neuroscience* **21**,  
661 1370–1377 (2001).
- 662 59. Chen, Z., Ivanov, P. C., Hu, K. & Stanley, H. E. Effect of nonstationarities on detrended  
663 fluctuation analysis. *Phys Rev E Stat Phys Plasmas Fluids Relat Interdiscip Topics* **65**, 15 (2002).
- 664

665 **Figure legends**

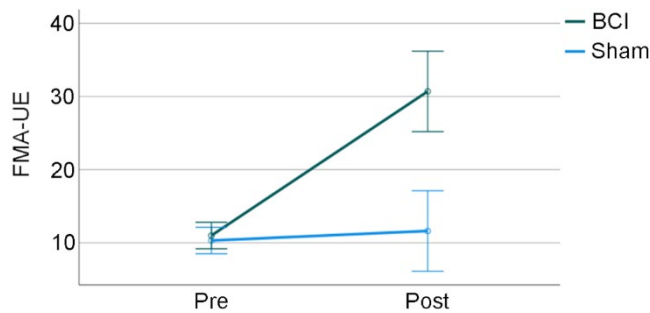

666

667 **Figure 1.** The Fugl-Meyer Assessment of the upper extremity (FMA-UE) showed greater motor recovery  
668 in the BCI group post-treatment than the Sham group. Interaction between *Time* and *Group*:  $F(1) =$   
669  $8.03$ ,  $p = 0.030$ , correcting for covariates *Age*, *Sex*, *Days Post-Stroke*, and *Days of Therapy*. Post hoc  
670 tests pre- to post-treatment: BCI:  $p = 0.004$ ; Sham:  $p = 0.77$ . (The maximum score of the FMA-UE is 66  
671 points.) Error bars = standard error of the mean.

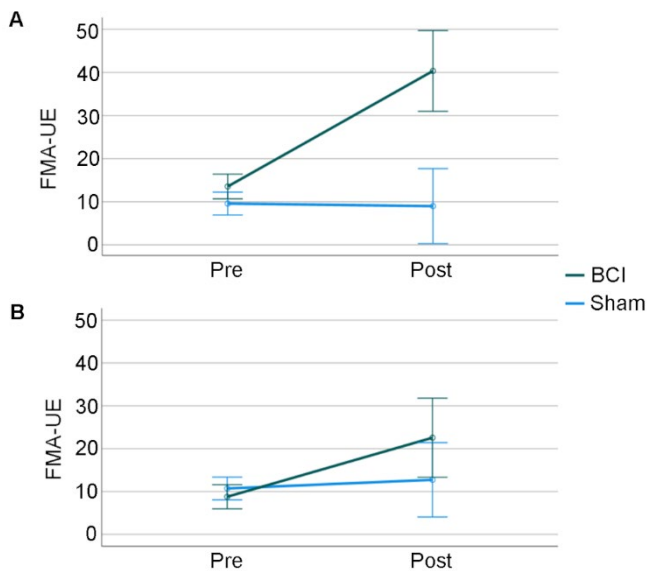

672

673 **Figure 2.** The improvement in Fugl-Meyer Assessment of the upper extremity (FMA-UE) score was  
674 greatest in the BCI group from pre- to post-treatment in patients who started treatment in the acute  
675 phase (within one month) post-stroke compared with patients in the Sham group and with patients in  
676 either group starting treatment in the subacute phase. Including *Therapy start* as a factor: interaction  
677 *Time x Group* ( $F(1) = 6.66$ ,  $p = 0.049$ ) **A.** Patients starting treatment in the acute phase: post hoc  $p =$   
678  $0.016$ . **B.** Patients starting treatment in the subacute phase: post hoc  $p = 0.78$ . Error bars = standard  
679 error of the mean.

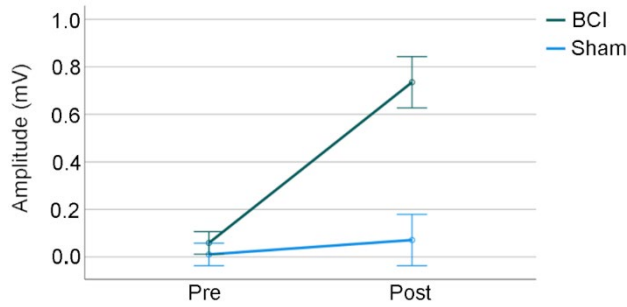

680

681 **Figure 3.** The amplitude of the transcranial magnetic stimulation (TMS)-induced motor evoked  
 682 potentials increased following treatment in the BCI group but not the Sham group. Interaction: *Group*  
 683 and *Time* ( $F(1) = 27.69$ ,  $p = 0.034$ ), correcting for covariates. BCI: post hoc  $p = 0.012$ ; Sham: post hoc  $p$   
 684  $= 0.050$ . TMS was applied at electrode location C2, contralateral to the affected limb. Error bars =  
 685 standard error of the mean.

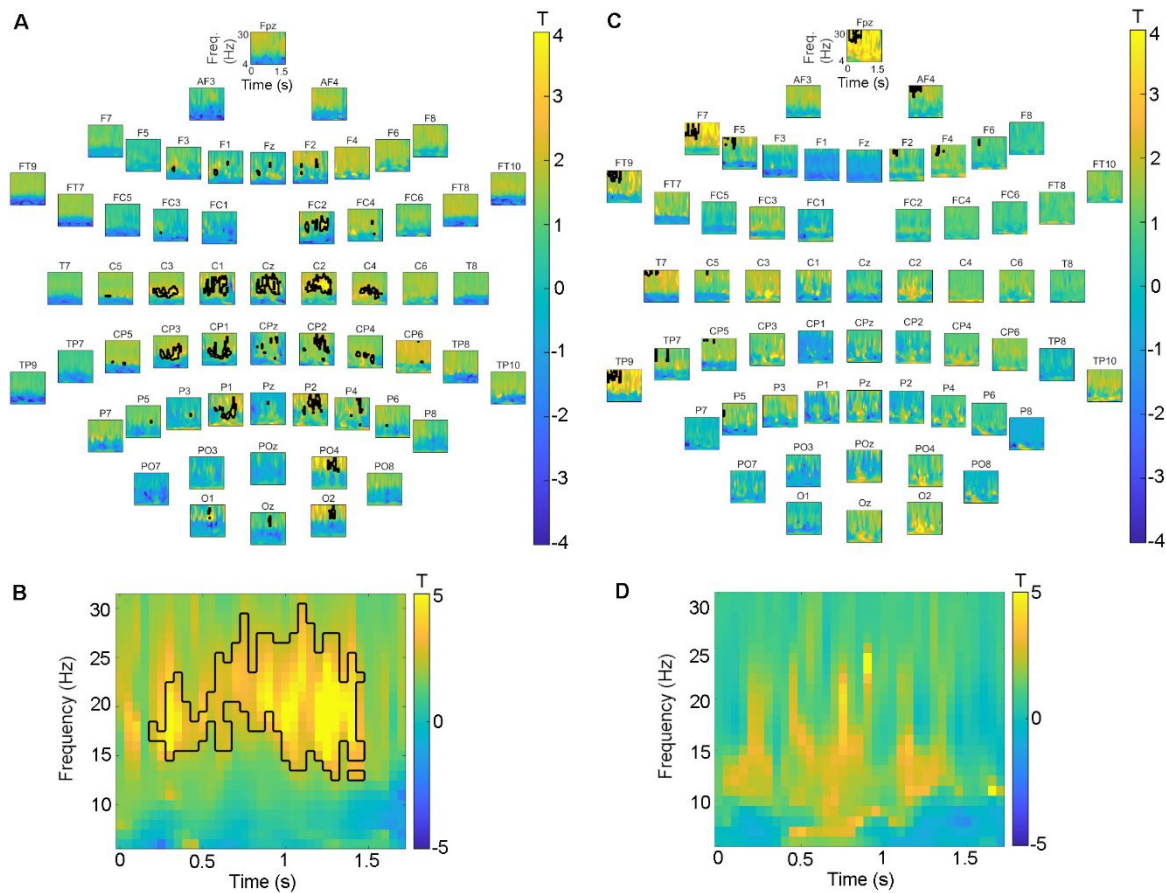

686

687 **Figure 4.** Spectral power pre-treatment minus power post-treatment in each group. Spectral power  
 688 reduction was greatest from pre- to post-treatment over contralateral (ipsilesional) primary motor  
 689 cortex in the BCI group. Note that the positive T-values indicate a greater in desynchronization post-  
 690 than pre-treatment. Black contour = cluster of adjacent time–frequency points at which the post- vs-  
 691 pre-treatment power differed according to paired T-tests at threshold  $p = 0.05$ . **A.** BCI group: at each  
 692 electrode. **B.** BCI group: largest cluster observed at electrode C2, over right primary motor cortex. **C.**  
 693 Sham group: at each electrode. **D.** Sham group: at electrode C2, over right primary motor cortex.  
 694 Cluster-based permutation testing showed a significant difference between spectral power pre- and  
 695 post-treatment in the BCI group ( $p = 0.036$ ).

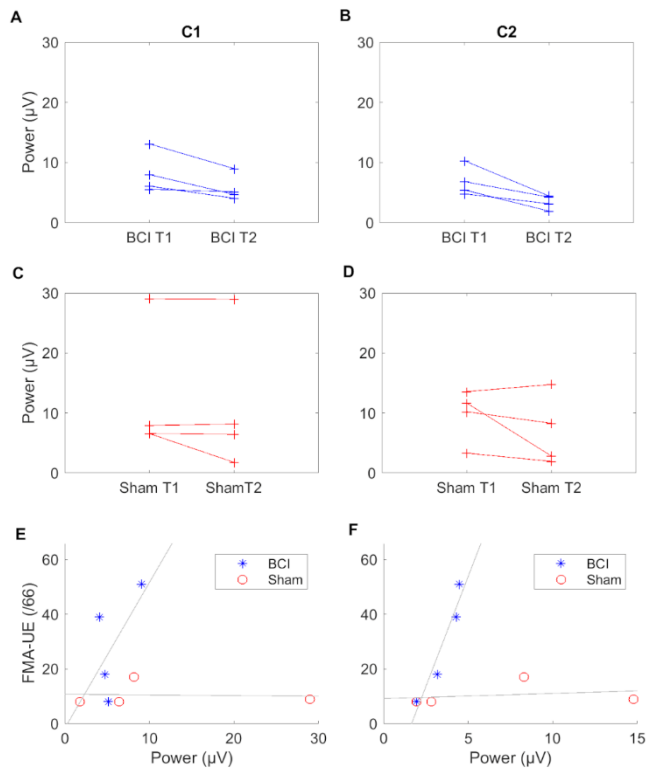

696

697 **Figure 5.** Individual patient beta (15-23 Hz) spectral power at 1.2 to 1.4 s post-movement cue before  
 698 before and after treatment. **A.** Over motor cortex ipsilateral to affected hand movement (C1) in the BCI group.  
 699 **B.** Over motor cortex contralateral to affected hand movement (C2) in the BCI group. **C.** Over motor  
 700 cortex ipsilateral to affected hand movement (C1) in the Sham group. **D.** Over motor cortex  
 701 contralateral to affected hand movement (C1) in the Sham group. **E.** Correlation between beta spectral  
 702 power ipsilateral to affected hand movement (C2) and FMA-UE after treatment. **F.** Correlation  
 703 between beta spectral power contralateral to affected hand movement (C2) and FMA-UE after  
 704 treatment ( $r(2) = 0.96$ ,  $p = 0.044$ ). No other correlation was significant.

705

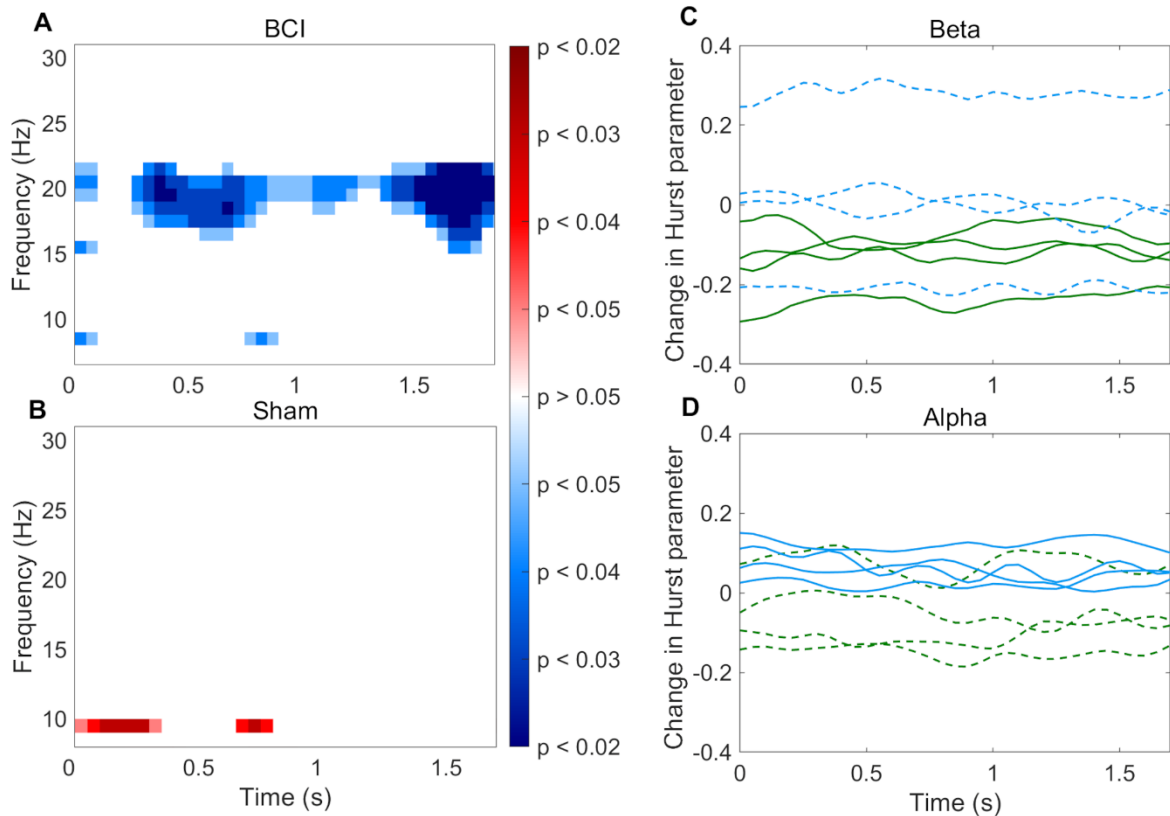

706  
 707 **Figure 6.** Changes in long-range temporal correlation (LRTC), quantified using the Hurst parameter, in  
 708 high density EEG data recorded after compared with before the therapy program. Averaging over the  
 709 beta frequency range at which power decreased post-therapy in the BCI group (15-23 Hz) and over  
 710 time, LRTC decreased only in the BCI group (paired T-tests, BCI:  $T = -3.38$ ,  $p = 0.043$ ; Sham:  $T = 0.19$ ,  $p$   
 711  $= 0.86$ ). **A, B.** Significance of the pre- to post-treatment LRTC difference over frequency and time based  
 712 on pairwise T-tests. **A.** BCI group. **B.** Sham group. **C, D.** Changes in Hurst parameter in individual  
 713 patients. Green: BCI group; Blue: Sham group; Solid lines: significant difference on T-test in this group  
 714 and frequency; Dashed lines: difference not significant **C.** At beta (18 Hz). **D.** At alpha (9 Hz).

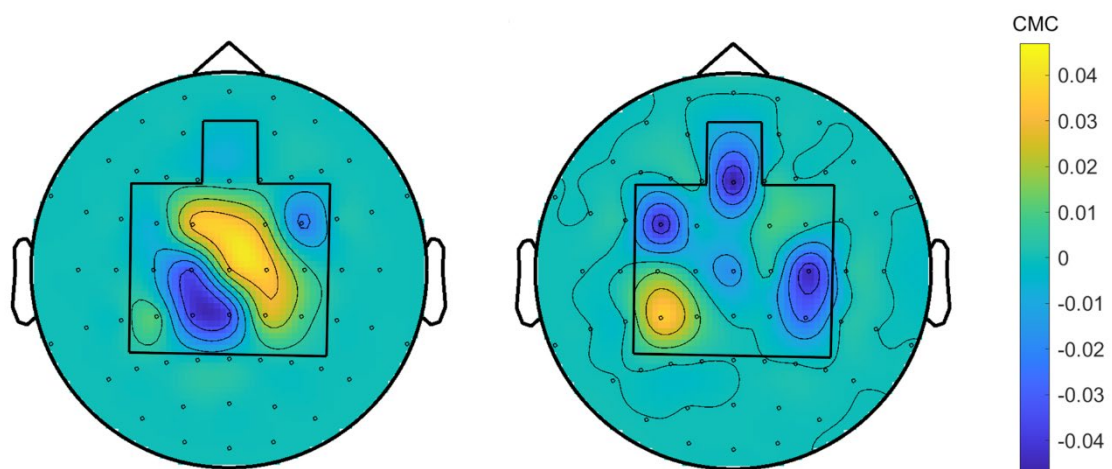

715  
 716 **Figure 7.** EEG-EMG coherence in the beta frequency range (0.5-1.5 s; 15-23 Hz): difference between  
 717 pre- and post-therapy. **A.** BCI group (paired T-test:  $T = -3.45$ ,  $p = 0.041$ ). **B.** Sham group (paired T-test:  
 718  $T = -0.073$ ,  $p = 0.95$ ).

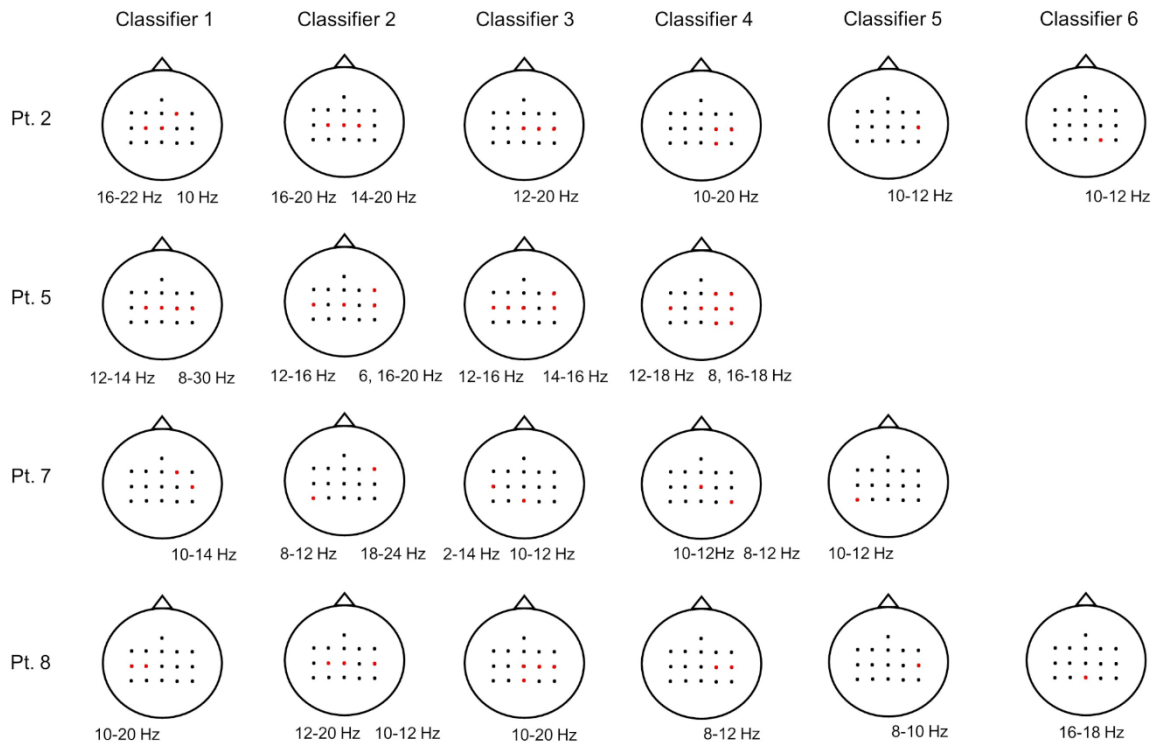

719

720

721

722

723

**Supplementary figure 1. Classifier features.** Features selected for classifiers for patients in the BCI group over the course of the therapy program. Note that classifiers were not trained to determine the timing of functional electrical stimulation in the Sham group. Selected electrodes are highlighted in red, and the frequencies chosen are given below the relevant electrode.
